# Supplementary material for: Gaze Restriction and Reactivation of Place-bound Content Drive Eye Movements During Mental Imagery
Source: PubMed Central journal article supplement (PMC10473167; doi:10.5334/joc.316), 2023-08-31
Supplement: joc-6-1-316-s1.pdf [file joc-6-1-316-s1.pdf]

1 **Supplementary Material: Gaze restriction and reactivation of place-bound**  
2 **content drive eye movements in mental imagery**

3 Lilla M. Gurtner<sup>1</sup>, Walter F. Bischof<sup>2</sup>, and & Fred W. Mast<sup>1</sup>

4 <sup>1</sup> Department of Psychology

5 University of Bern

6 Bern

7 Switzerland

8 <sup>2</sup> Department of Psychology

9 University of British Columbia

10 Vancouver BC

11 Canada

**Author Note**

12

13

14           The authors made the following contributions. Lilla M. Gurtner: Conceptualization,  
15 Data curation, Formal analysis, Methodology, Project administration, Visualization, Writing  
16 - Original Draft Preparation, Writing - Review & Editing; Walter F. Bischof:  
17 Conceptualization, Writing - Review & Editing; Fred W. Mast: Conceptualization,  
18 Supervision, Writing - Review & Editing.

19           Correspondence concerning this article should be addressed to Lilla M. Gurtner,  
20 Fabrikstrasse 8, 3012 Bern, Switzerland. E-mail: [lilla.gurtner2@psy.unibe.ch](mailto:lilla.gurtner2@psy.unibe.ch)

21 **Supplementary Material: Gaze restriction and reactivation of place-bound**  
 22 **content drive eye movements in mental imagery**

23 The Supplementary Material contains additional information with regard to the  
 24 variables and analyses.

25 **1. Model specifications**

26 We used the brms-package (Bürkner, 2018) to fit our models to the data. Here, we  
 27 provide the formulae used to fit the different models.

28 ***RQA fits***

29 Experiment A:

30  $\text{RQA measure} / 100 \sim 1 + \text{nSegments} * \text{spread} +$   
 31  $(1 | \text{stim\_name}) + (1 + \text{nSegments} * \text{spread} | \text{participant})$

33 Experiment B:

34  $\text{RQA measure} / 100 \sim 1 + \text{nSegments} * \text{spread} + \text{DVN} +$   
 35  $(1 | \text{stim\_name}) + (1 + \text{nSegments} * \text{spread} + \text{DVN} | \text{participant})$

37 ***Spread of fixations***

38 Experiment A:

39  $\text{spread of fixations} \sim 1 + \text{nSegments} +$   
 40  $(1 | \text{stim\_name}) + (1 + \text{nSegments} | \text{participant})$

42 Experiment B:

43  $\text{spread of fixations} \sim 1 + \text{nSegments} * \text{DVN} +$

44 (1 | stim\_name) + (1 + nSegments \* DVN| participant)

45

46

47

## 2. Deletion of trials

48 We excluded trials with low imaginability ratings (equal or below 2) from our analysis  
 49 to ensure that we only analyze trails in which imagery was successful. Furthermore, we  
 50 excluded trials in which participants gave wrong answers. Since the stimuli increased in  
 51 difficulty, this could potentially lead to more deletions of stimuli with more segments.  
 52 However, this was not the case, see table 1.

**Table 1**

*Deleted trials*

| experiment | n of segments | n deleted trials |
|------------|---------------|------------------|
| A          | 1             | 18               |
| A          | 2             | 24               |
| A          | 3             | 19               |
| A          | 4             | 13               |
| B          | 1             | 24               |
| B          | 2             | 26               |
| B          | 3             | 23               |
| B          | 4             | 28               |

*Note.* Shows the number of trials that were deleted because of wrong answers or imaginability ratings equal to or lower than 2.

3. Spread of black pixels

54

55 The spread of the stimuli might be a potential confound of the effect of stimulus  
 56 complexity on recurrence. We address this issue twofold, with a mediation analysis and by  
 57 means of model comparisons. Third, we explore the effect that the spread of pixels has on  
 58 the spread of participants' fixations.

59 We computed the spread of black pixels in each stimulus in an analogous fashion to  
 60 the spread of fixations: First, we computed the mean of the x and y locations of all  
 61 non-white pixels. Then, we computed distance of all non-white pixels to this average  
 62 location. The mean of all these distances represents the spread of black pixels. Figure 1,  
 63 illustrates the relationship between the spread of black pixels and the number of segments.

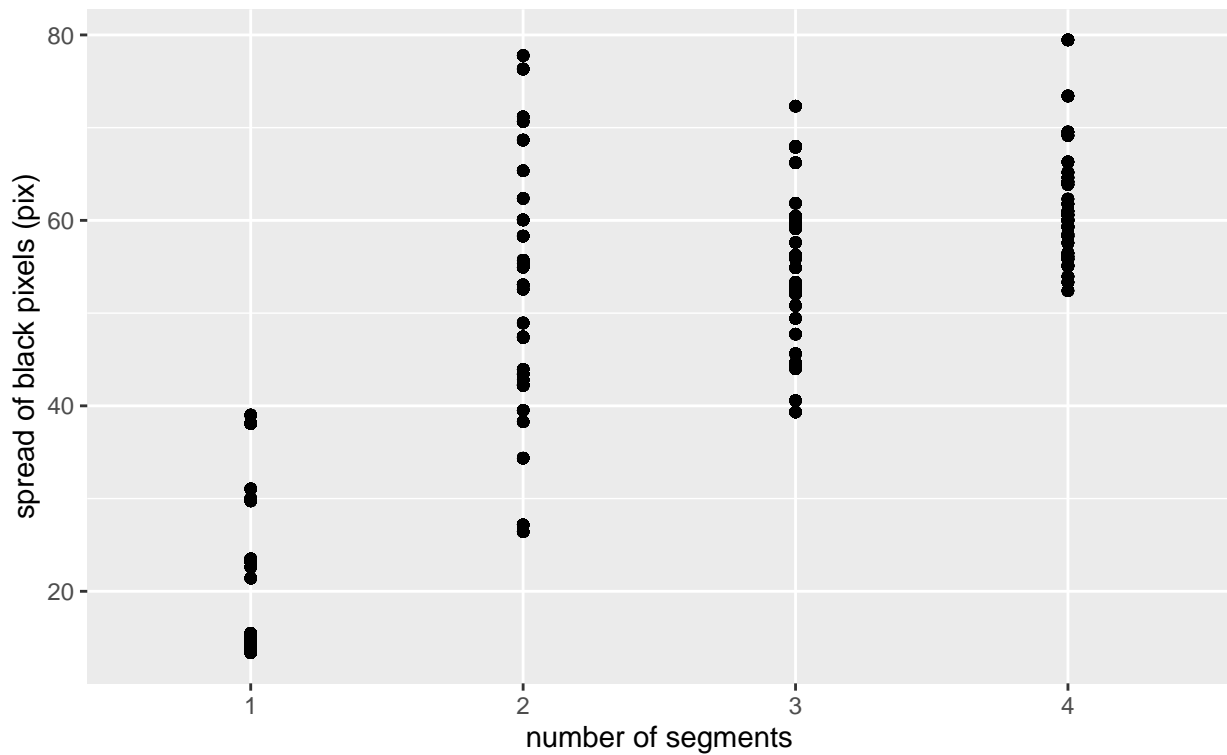

Figure 1

*The relationship between the spread of black pixels and the number of segments.*

64

We tested, whether the effect of the number of segments on recurrence is mediated by

65 the spread of black pixels in the stimuli participants maintained while the screen was blank.  
66 An effect of the pixel spread of an absent stimulus on gaze behavior is plausible if we assume  
67 a strong ‘looking at nothing’ effect (that is, gaze behavior is predominantly determined by  
68 the original stimulus as presented). To test whether the pixel spread is responsible for the  
69 effect of the number of segments on recurrence, we conducted a mediation analysis (following  
70 Kurz, 2019). We used a multivariate regression model in which we defined the two models as  
71 follows:

```
72 model_a: recurrence ~ 1 + spread + nSegments + pixel_spread
```

```
73 model_b: pixel_spread ~ 1 + nSegments
```

74 We used a lognormal link function for model\_a (a zero-one-inflated beta link function  
75 did not result in a satisfying overlap between predicted and actual recurrence values), and a  
76 student\_t link function for model\_b. The distribution of pixel spread was bimodal, with one  
77 mode for all one-segment stimuli consisting of just one black cell. Since this was very hard to  
78 fit with any link function, we decided to filter out all trials with a average pixel spread lower  
79 than 20. Unfortunately, we could not include random effects since the chains did not mix well  
80 under these circumstances. The mediation analysis showed that there is no indirect effect of  
81 the number of segments on recurrence. The posterior distribution of the indirect effect is  
82 shown in Figure 2. Thus, we conclude that there is no evidence for a mediation effect.

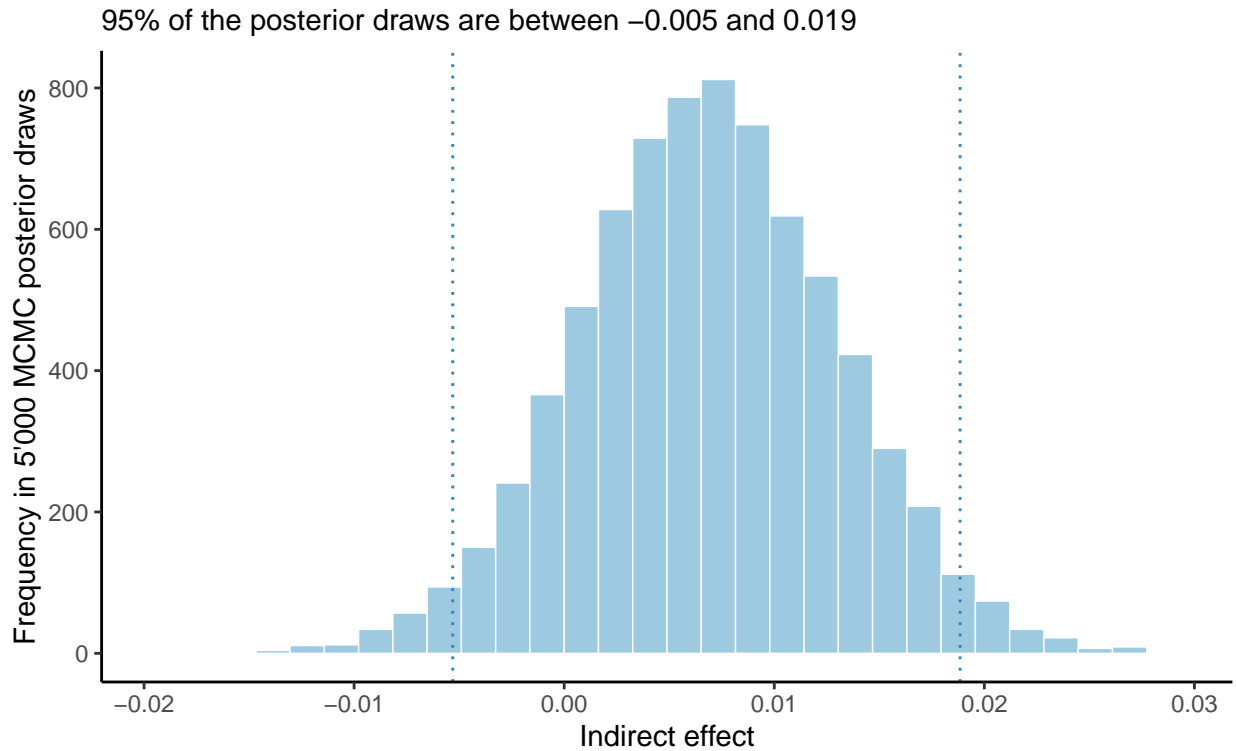

**Figure 2**

*Posterior distribution of the indirect effect of number of segments on recurrence, taking into account the possible mediation by pixel spread. Since the distribution clearly includes zero in its 95% credibility interval, we conclude that there is no evidence for a mediation effect.*

83 The mediation analysis we performed lacked multi-level structure and we did not  
 84 include all data in it. Hence, we confirmed its results by means of a model comparisons  
 85 approach.

86 In the model comparison approach, we compared two regression models, one of which  
 87 contained the pixel spread as predictor of gaze behavior and one of which did not. We tested,  
 88 whether adding pixel spread as predictor altered the effects of the other predictors and  
 89 whether the more complex model gave a better model fit, i.e. a better description of the data.

90 The pixel spread did not predict recurrence values in both experiments (Experiment

91 A: beta = 0.00, CI: 0.00 - 0.00, Experiment B: beta = 0.00, CI: 0.00 - 0.00). Including pixel  
 92 spread did not alter the effect of the number of segments substantially as can be seen in the  
 93 difference between posterior distributions of the effect in the two respective models  
 94 (Experiment A: median of difference between posterior distributions = 0.00, CI: -0.16 - 0.18,  
 95 Experiment B: median = -0.02, CI: -0.15 - 0.12). Finally, the model comparison showed that  
 96 the models without the distribution of the black pixels outperformed those that contained  
 97 the black pixels' distribution as a predictor (difference of expected log predictive densities  
 98 (elpd) from Experiment A: -1.47, se\_diff = 0.65, Experiment B: -1.69, se\_diff = 1.63).

99 Finally, the spread of the pixels in the stimulus might predict the spread of fixations,  
 100 assuming a strong 'looking at nothing' effect. We tested this with a lognormal regression  
 101 using the formula:

```
102 spread_of_fixations ~ 1 + pixel_spread * nSegments + Experiment +
103                       (1 + pixel_spread * nSegments|vp) +
104                       (1 + pixel_spread*nSegments | stim_name)
```

105 We found that the spread of pixels did not predict the spread of fixations (beta  
 106 coefficient: 0.00, lower CI: 0.00, upper CI: 0.01. Taken together, these results make us  
 107 confident that stimulus complexity in fact influenced gaze behavior and is not confounded  
 108 with the spread of pixels in the maintained stimulus.

#### 109 4. Effects of DVN

110 Dynamic visual noise did not influence the recurrence measures or the spread of  
 111 fixations. In table 2, we present the estimated beta coefficients for the DVN in all four  
 112 models. Again, we compared models in order to show that adding DVN does not increase  
 113 the predictive power of the respective models. The results of the model comparisons are  
 114 shown in table 3. DVN had no effect on gaze properties, suggesting that any potential  
 115 retinocentric afterimages did not systematically influence participants' gaze behavior, as the



**Table 2**

*Effect of DVN on eye movements*

| dependent variable | beta coefficient | CI <sub>lower</sub> | CI <sub>upper</sub> |
|--------------------|------------------|---------------------|---------------------|
| recurrence         | -0.01            | -0.06               | 0.05                |
| determinism        | -0.01            | -0.07               | 0.06                |
| CORM               | -0.01            | -0.04               | 0.02                |
| spread             | -1.85            | -6.81               | 3.01                |

*Note.* Evidence for the absence of an effect of the dynamic visual noise on recurrence parameters and on the spread of fixations.

116 gaze properties remained the same regardless of whether afterimages were masked with DVN  
 117 or not.

**Table 3**

*Predictive power of dynamic visual noise*

| dependent variable | elpd difference | se(elpd) |
|--------------------|-----------------|----------|
| recurrence         | -2.22           | 0.64     |
| determinism        | -2.13           | 0.80     |
| CORM               | -1.04           | 1.89     |
| spread             | -20.01          | 9.03     |

*Note.* The difference of expected log predictive densities (elpd) of models that contain DVN as a predictor and models that do not. Negative values indicate that in all cases, the model that contains DVN has lower predictive power.

118

119

## 5. Reanalysis of previous data sets

### 5.1 Relationship between recurrence and spread

121 The present experiment shows a specific, non-linear relationship between the spread  
 122 of fixations and recurrence. It could be argued that the relationship between recurrence and  
 123 the spread of fixations is caused by the specific spatial layout of our stimuli. We therefore  
 124 reanalyzed data from a recent publication (Gurtner, Hartmann, & Mast, 2021). In this  
 125 experiment, the stimuli (art, faces and landscapes) covered the entire screen. Figure 3 shows  
 126 that the pattern of the relationship is similar to the one presented in the main article.

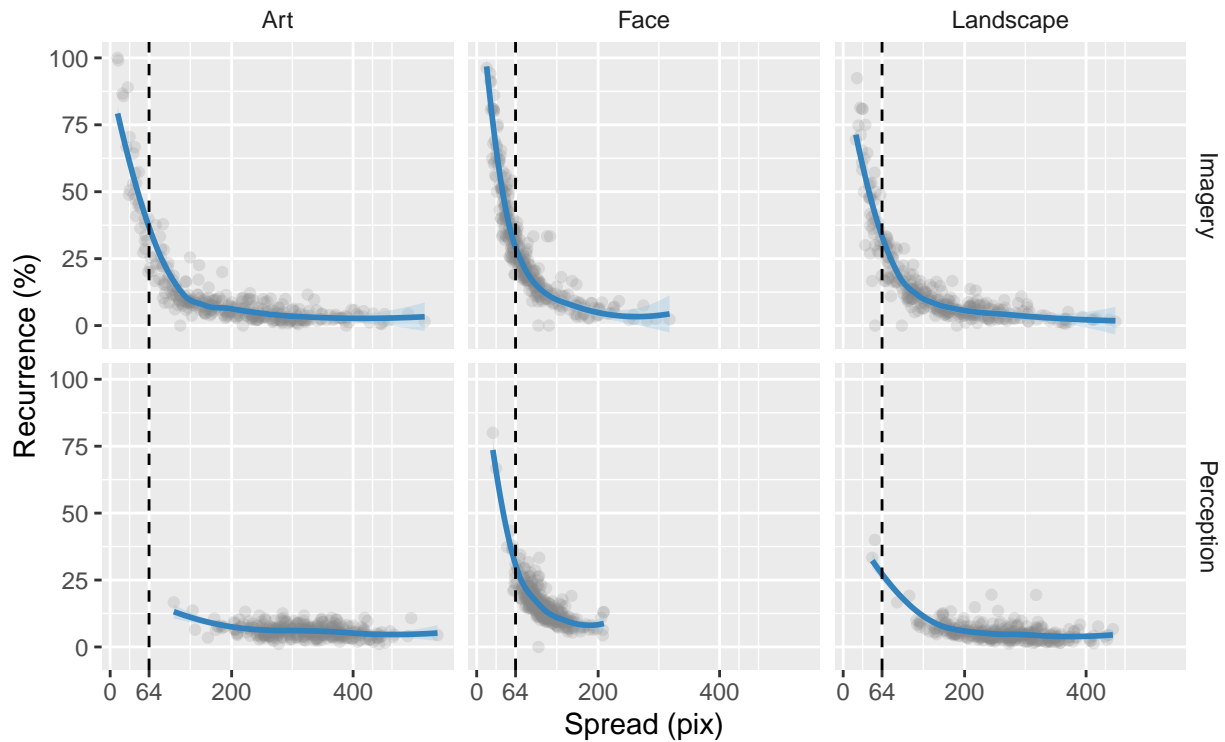

**Figure 3**

*Relationship between the spread of fixations and recurrence in stimuli that covered the entire screen. The pattern of the relationship in mental imagery is strikingly similar to the pattern in the main article.*

## 127 **5.2 Correlation between recurrence and determinism**

128 Recurrence and determinism of eye movements are correlated in perception  
129 (Anderson, Bischof, Laidlaw, Risko, & Kingstone, 2013) and also during mind wandering  
130 (Zhang, 2020). In mental imagery, the correlation between recurrence and determinism was  
131 particularly high (0.89 compared to 0.67 in Zhang (2020) for example). To test whether the  
132 correlation in mental imagery was significantly higher compared to perception, we reanalyzed  
133 data from a recent publication (Gurtner et al., 2021), where participants saw a picture (art,  
134 face or landscape) and subsequently imagined it for 15 seconds each. The correlations  
135 between recurrence and determinism are not independent in this case, since we used repeated  
136 measures over participants. Therefore, standard methods to compare two correlation  
137 coefficients were not applicable. Instead, we performed a permutation test on the difference  
138 between the two correlations. Specifically, we tested whether the difference between the  
139 correlation in perception and mental imagery was higher than what could be expected by  
140 chance. This was the case in 96.53% of the cases, corresponding to a p-value of 0.03. Thus,  
141 in mental imagery, the association of recurrence and determinism is higher than in  
142 perception. This means that in imagery, more of refixations are part of systematic refixation  
143 patterns when compared to perception.

## 144 **6. Distribution of random intercepts**

145 Multi-level models allow for assessing inter-individual variance by estimating random  
146 intercepts. We use this possibility to further illustrate that the large observed over-all  
147 variance in RQA parameters is caused by consistent inter-individual differences in RQA  
148 values. The random intercepts for each person are distinct from each other and not include  
149 zero in their CIs (see Figure 4). This means that participants differ from the overall  
150 recurrence level in idiosyncratic ways, supporting the notion of large interindividual  
151 differences in eye movements during imagery.

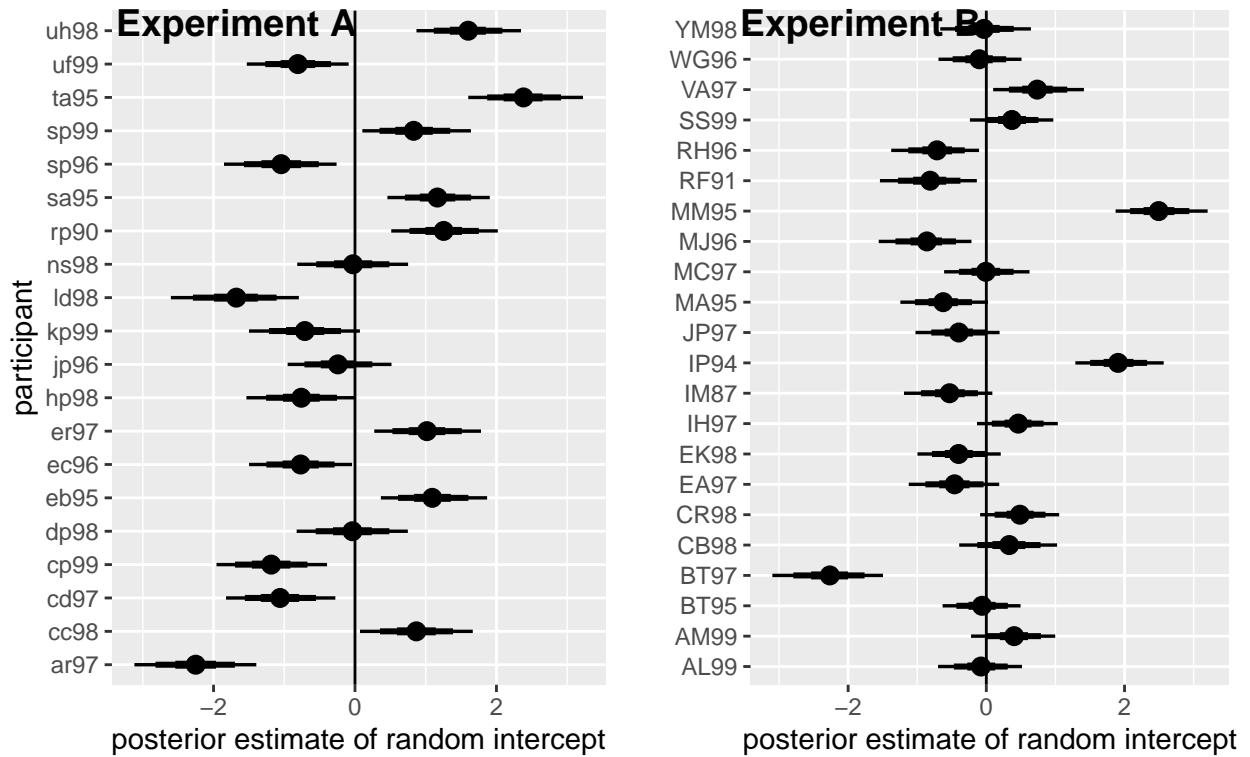

Figure 4

Posterior estimates of the random intercepts for each participant in both experiments.

## 7. Recurrence thresholds

152

153

154

155

156

157

158

159

160

161

162

163

The calculation of recurrence depends on the choice of the threshold distance below which two fixations are considered recurrent. Often, the threshold is chosen as the diameter of the fovea. In the case of mental imagery, it is questionable, whether this choice of a threshold is justified. We therefore re-analyzed the data with different thresholds. Figure 5 shows how the relationship between the spread of fixations and recurrence changes, as the threshold for defining re-fixations increases. The stimulus we used measured 462 x 567 pixels, each cell within the stimulus measured 109 x 108 pixels, the screen measured 1280 x 1024. This information can provide a reference for the threshold choices. Note that, in order to see high recurrence at the same time as very widely spread out fixations, the threshold to define recurrence must be set to be almost the size of the entire screen, at which point RQA becomes meaningless as we excluded fixations out of the screen.

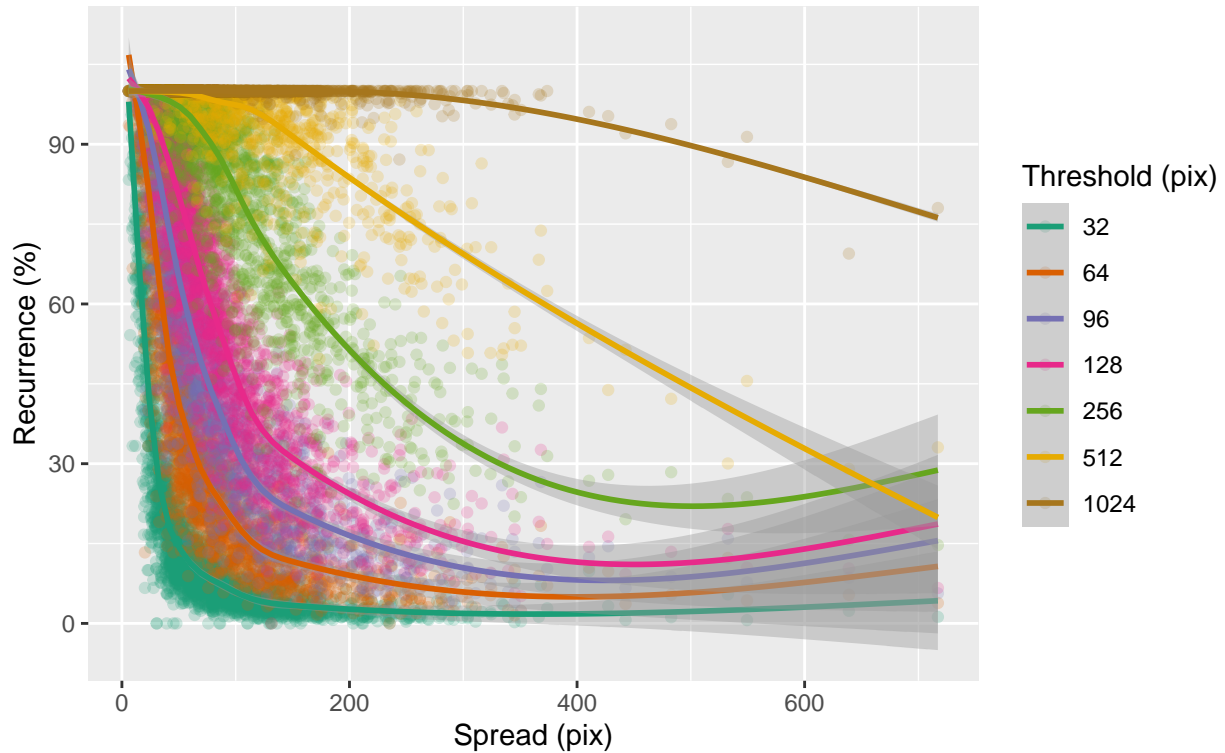

**Figure 5**

*The relationship between recurrence and spread of fixations as the definition for refixations change.*

164 To test whether the effect of the stimulus complexity on temporal gaze dynamics  
 165 depended on the choice for the thresholds, we reran the analysis of the main article with  
 166 different criteria to define recurrence. This was done for the threshold distances of 32, 96,  
 167 128, and 256 pixel. Figure 6 shows how the effect of stimulus complexity on recurrence  
 168 changes with the choice of the threshold distance. As the threshold distance between  
 169 recurrent fixations increases, the effect of the complexity on recurrence vanishes (the  
 170 posterior samples are centered around zero). At the largest threshold definition, most  
 171 fixations are considered recurrent and no variance between the stimuli is left and the effect of  
 172 stimuli complexity on recurrence vanishes.

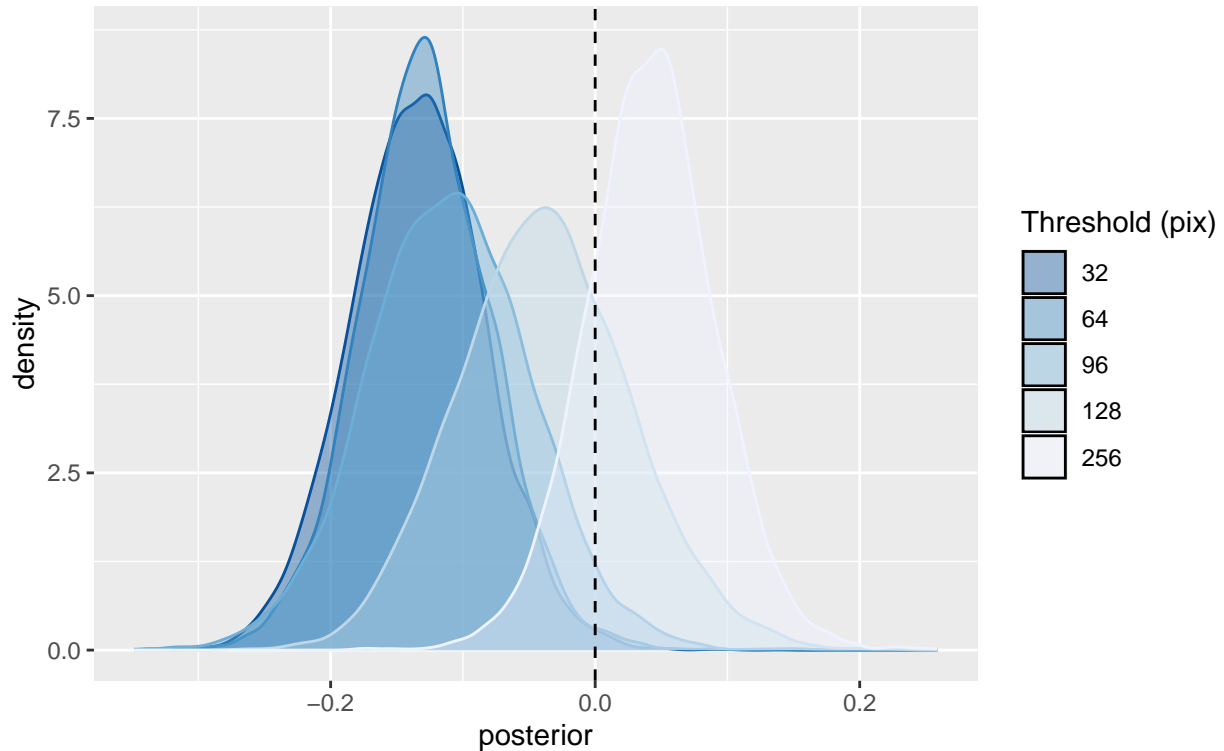

**Figure 6**

*Posterior samples of the effect of complexity on recurrence, depending on the choice of the threshold distance between two recurrent fixations. The analysis of the main article used a threshold distance of 64 pixel, approximately the size of the fovea.*

173

## 8. Imaginability ratings and complexity

174

175

176

177

178

179

180

181

182

The number of segments in the stimuli influenced participants' performance (Figure 5 in the article). However, their subjective experience ratings did not show a similar effect (see Figure 7). The mean rating on the y axis indicates how well participants were able to imagine the stimuli on a scale from 1-7. On average, participants gave high ratings for all complexity categories, which is in line with the ceiling-effect in performance we report in the manuscript in Figure 5 in the main article. Hence, the task was easy objectively and subjectively. Nevertheless, the objective performance assessment was able to show a decrease in higher complexity stimuli, but this apparently did not translate to the subjective experience of participants (no decrease in Figure 7 below). The relationship in Figure 7 is

183 independent of how we operationalize picture complexity. It looks similar if we  
 184 operationalize “stimulus complexity” as the number of cells as indicator for complexity or by  
 185 multiplying the number of cells with the number of segments. Therefore, we have decided to  
 186 refrain from conducting further analysis in this regard.

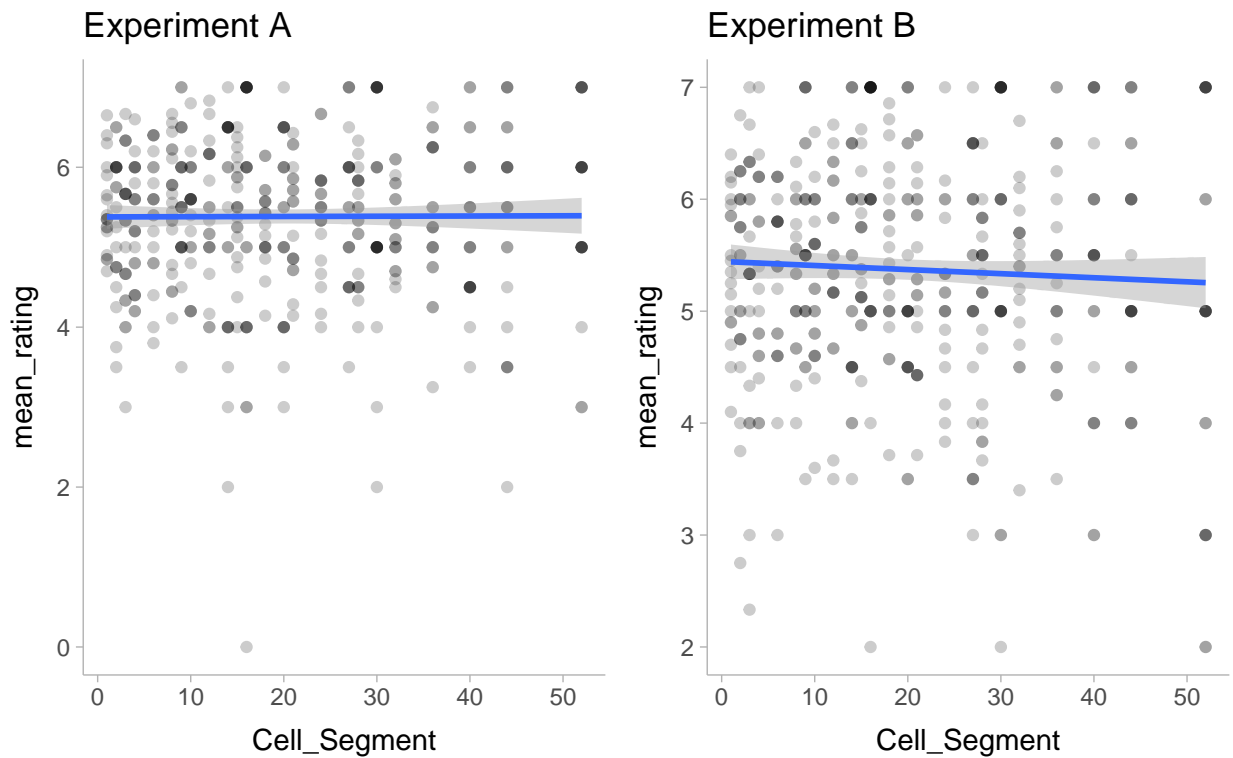

**Figure 7**

*Relationship between the spread of fixations and recurrence in stimuli that covered the entire screen. The pattern of the relationship in mental imagery is strikingly similar to the pattern in the main article.*

### References

- 187 Anderson, N. C., Bischof, W. F., Laidlaw, K. E. W., Risko, E. F., & Kingstone, A.  
 188 (2013). Recurrence quantification analysis of eye movements. *Behavior Research*  
 189 *Methods*, 45, 842–856. <https://doi.org/10.3758/s13428-012-0299-5>  
 190  
 191 Bürkner, P.-C. (2018). Advanced Bayesian multilevel modeling with the R package  
 192 brms. *The R Journal*, 10(1), 395–411.

193 Gurtner, L. M., Hartmann, M., & Mast, F. W. (2021). Eye movements during visual  
194 imagery and perception show spatial correspondence but have unique temporal  
195 signatures. *Cognition*, *210*, 104597.

196 <https://doi.org/10.1016/j.cognition.2021.104597>

197 Kurz, S. (2019). *The simple mediation model*. Retrieved from

198 [https://bookdown.org/ajkurz/recoding\\_Hayes\\_2018/the-simple-mediation-](https://bookdown.org/ajkurz/recoding_Hayes_2018/the-simple-mediation-model.html)  
199 [model.html](https://bookdown.org/ajkurz/recoding_Hayes_2018/the-simple-mediation-model.html)

200 Zhang, H. (2020). *Mind-Wandering: What Can We Learn from Eye Movements?*

201 <https://doi.org/10.31234/osf.io/n9fbz>
